# Supplementary material
Source: publisher site journal article supplement (https://en-cdn.bio-protocol.org/attached/file/20220124/4305%20Supplementary%20Materials.docx)
Supplement: Supplementary file 1 [file 4305%20Supplementary%20Materials.docx]

**Transient Intraluminal Middle Cerebral Artery Occlusion in Mouse: Protocol for Ischemic Stroke Model**

**SUPPLEMENTARY MATERIALS**

Luke R. Lemmerman1, #, Hallie N. Harris2, #, Maria H. H. Balch2, #, Maria A. Rincon-Benavides1, 3, Natalia Higuita-Castro1, 4, W. David Arnold2 and Daniel Gallego-Perez1, 4, *

1Department of Biomedical Engineering, The Ohio State University, Columbus, USA

2Department of Neurology, The Ohio State University, Columbus, USA

3Biophysics Graduate Program, The Ohio State University, Columbus, USA

4Department of Surgery, The Ohio State University, Columbus, USA

*For correspondence: [gallegoperez.1@osu.edu](mailto:gallegoperez.1@osu.edu)

#Contributed equally to this work


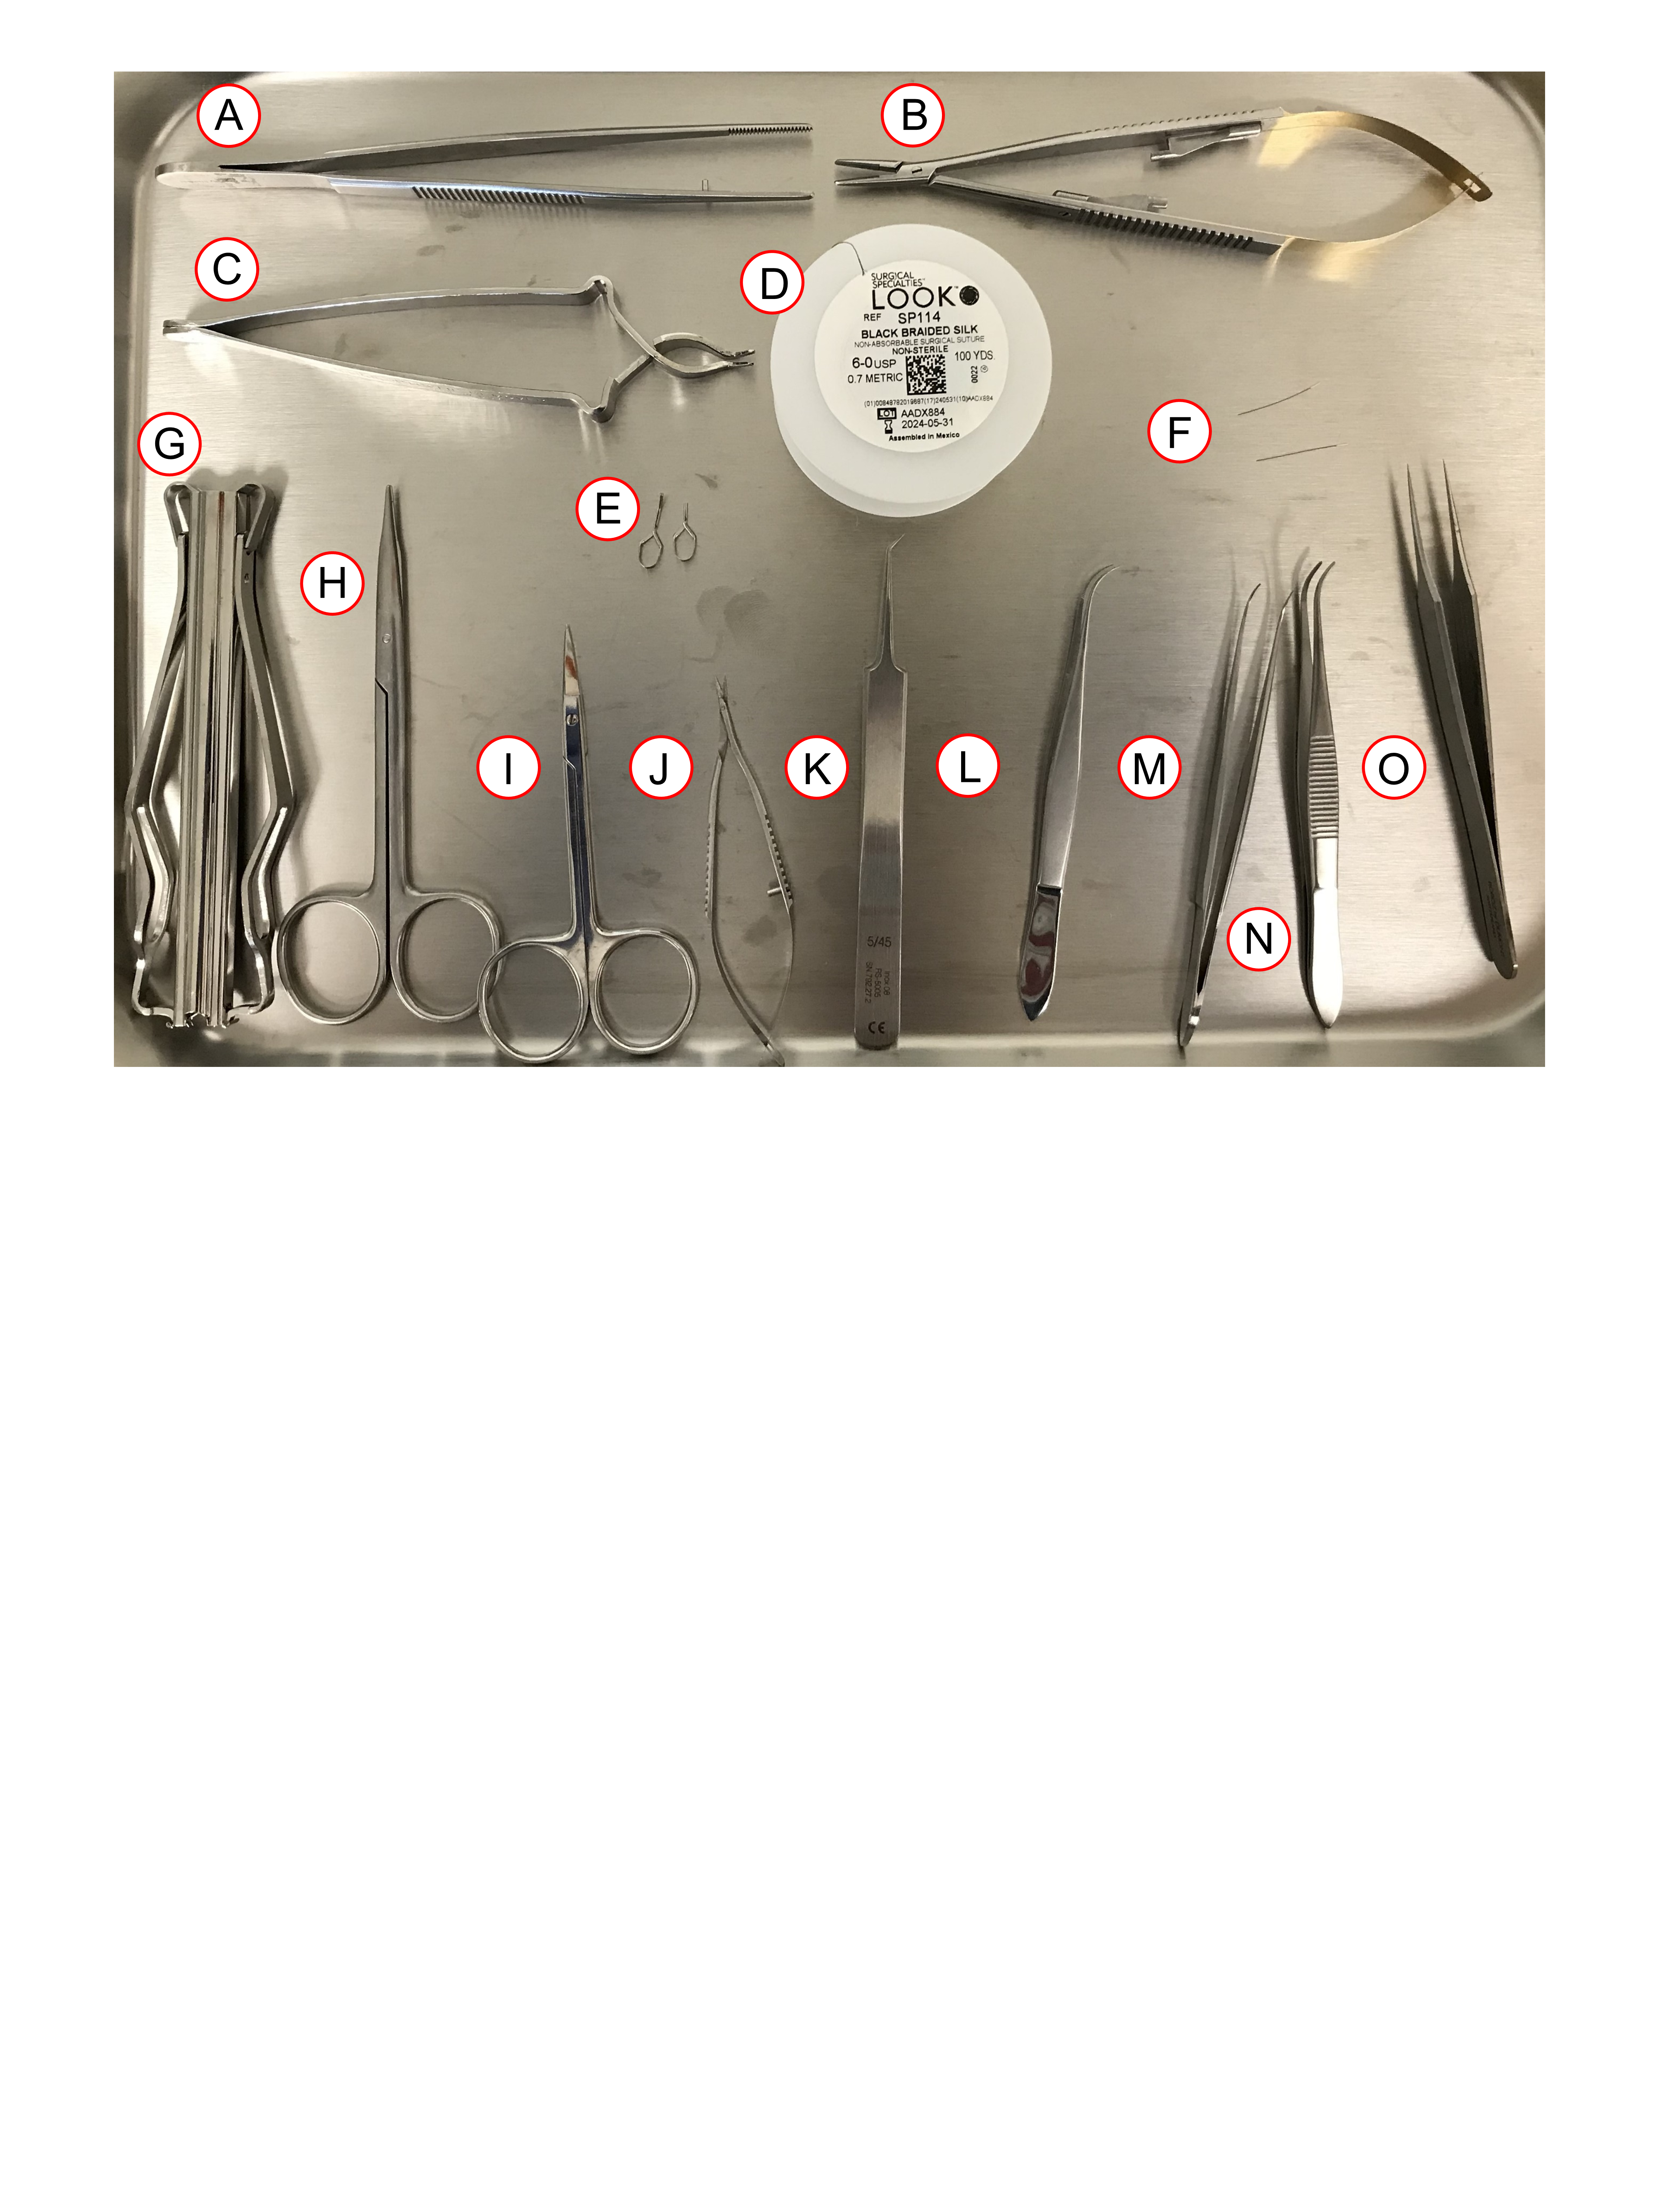


**Figure S1. Surgical tools for MCAO procedure.**

**A)** Micro Clip Applying Forceps, **B)** Castroviejo Needle Holder-locking, **C)** Autoclip Remover, **D)** 6-0 Spool Black Braided Silk Sutures, **E)** One Curved and One Straight Micro Clip, **F)** Two Silicone Rubber-Coated Monofilaments, **G)** AutoClip Applier **H)** Tenotomy Scissors, **I)** Extra Fine Bonn Scissors, **J)** Vannas Spring Scissors 3mm Cutting Edge, **K)** Dumont #5 Forceps, **L-M)** Two Moria Iris Forceps, **N)** Graefe Curved And Serrated Forceps, **O)** Dumont #4 Forceps.


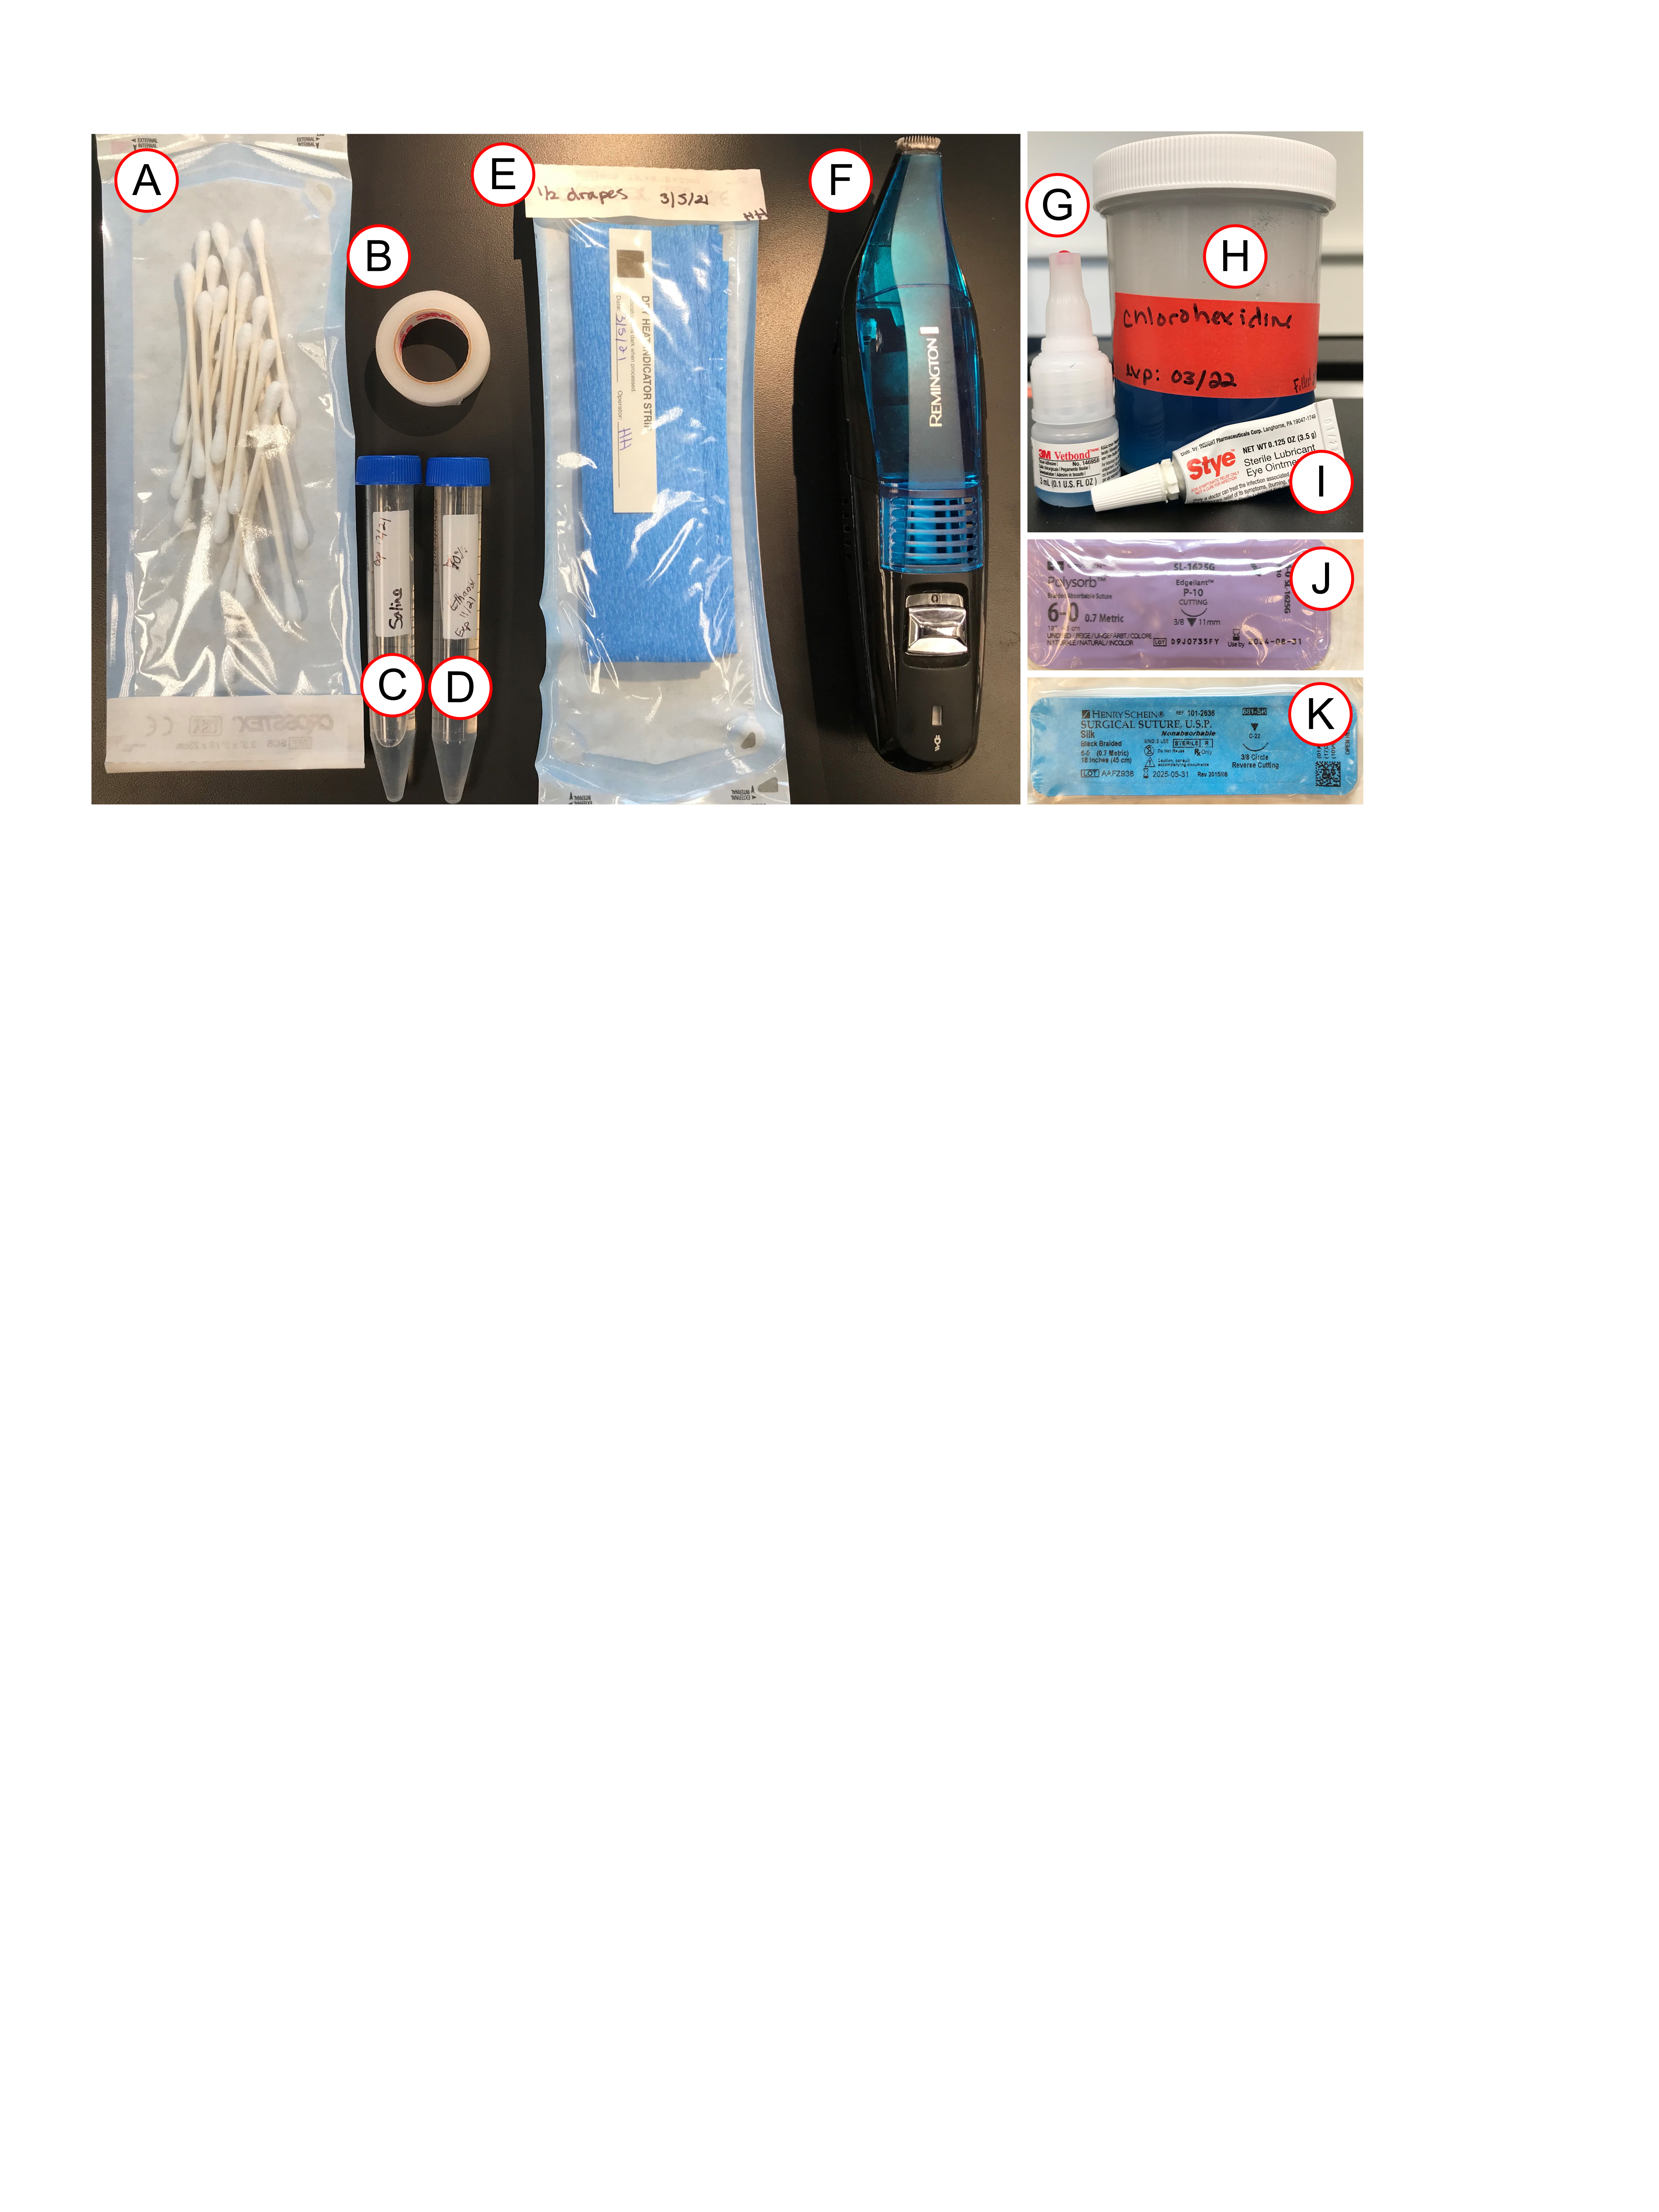


**Figure S2. Supplies and reagents used in MCAO procedure.**

**A)** SterilizedCotton Tip Applicators, **B)** Surgical Tape, **C)** 0.9% Sodium Chloride Solution, **D)** 70% Ethanol Solution, **E)** Surgical Drapes, **F)** Electric Razor With Vacuum, G**)** Vet Bond Tissue Adhesive, **H)** Chlorhexidine, **I)** Artificial Tear Ointment, **J)** 6-0, P-10 Braided Polyester Absorbable Sutures, **K)** 6-0, C-22 Black Braided Silk Sutures.


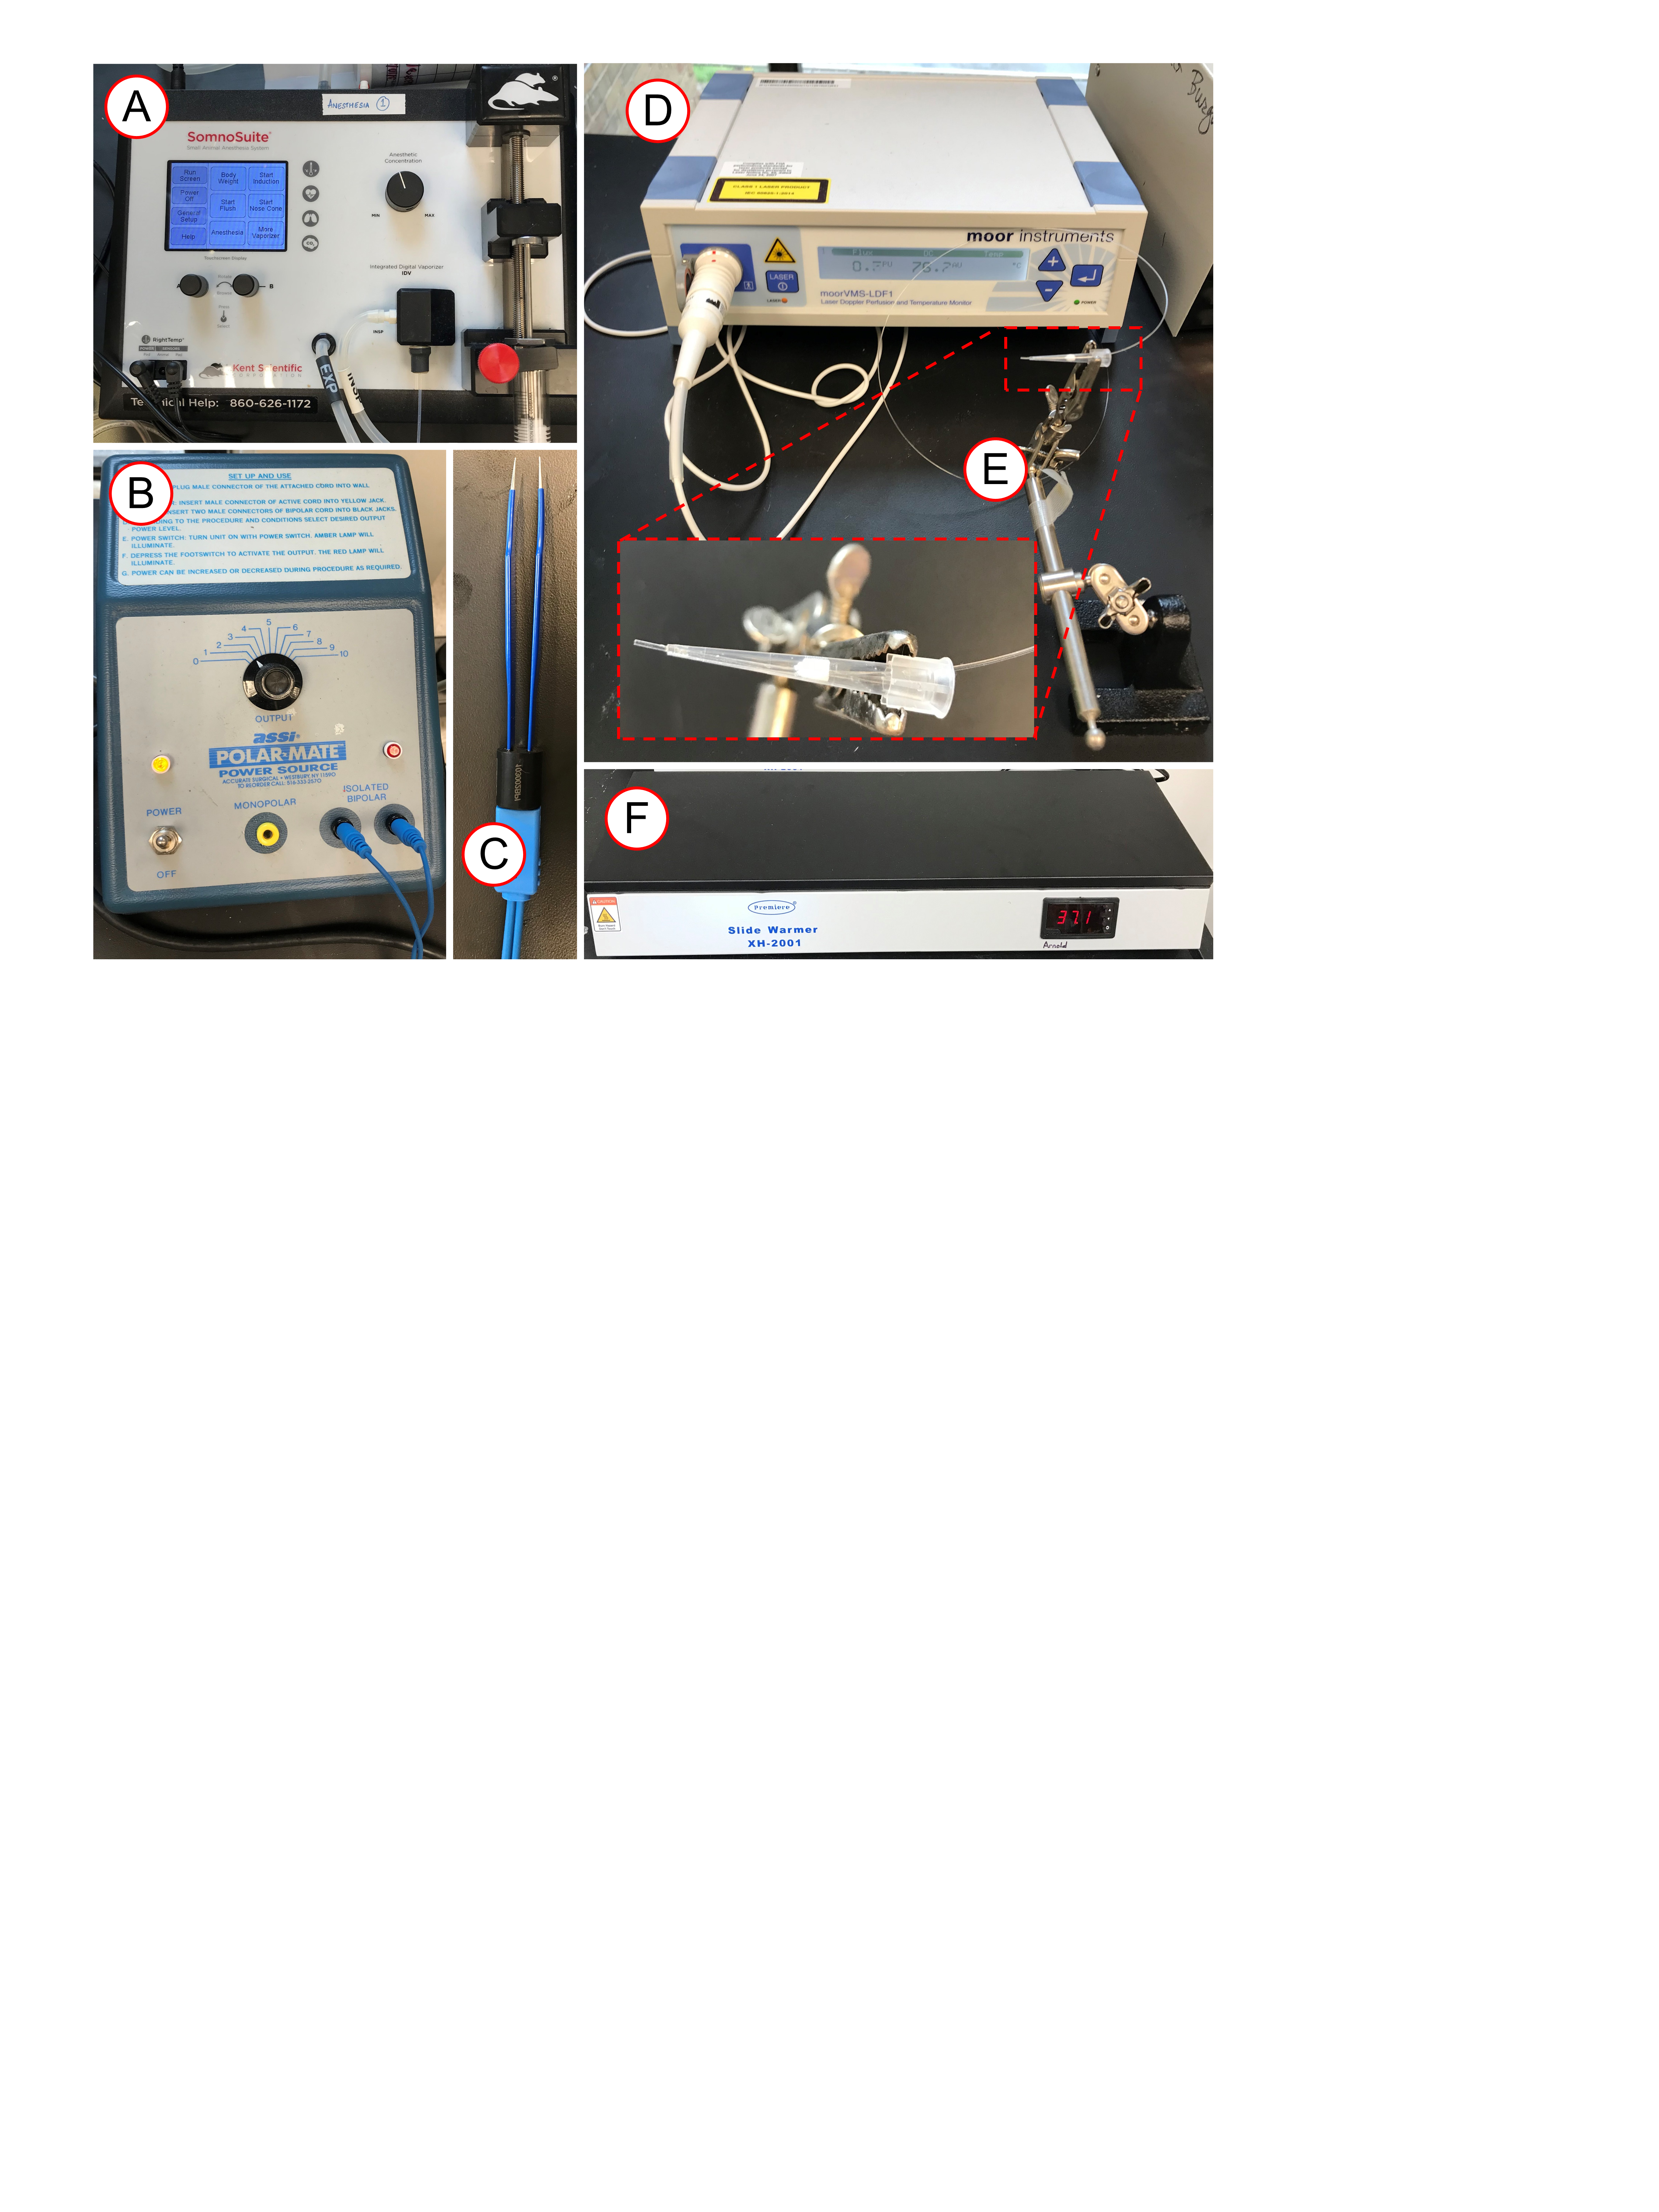


**Figure S3. Equipment used in MCAO surgery.**

**A)** Somnosuite Low-flow Anesthesia System, **B)** Bipolar Coagulator, **C)** Bipolar Forceps, **D)** Laser Doppler System, **E)** Optic Fiber inset, **F)** Slide Warmer With Temperature Control.


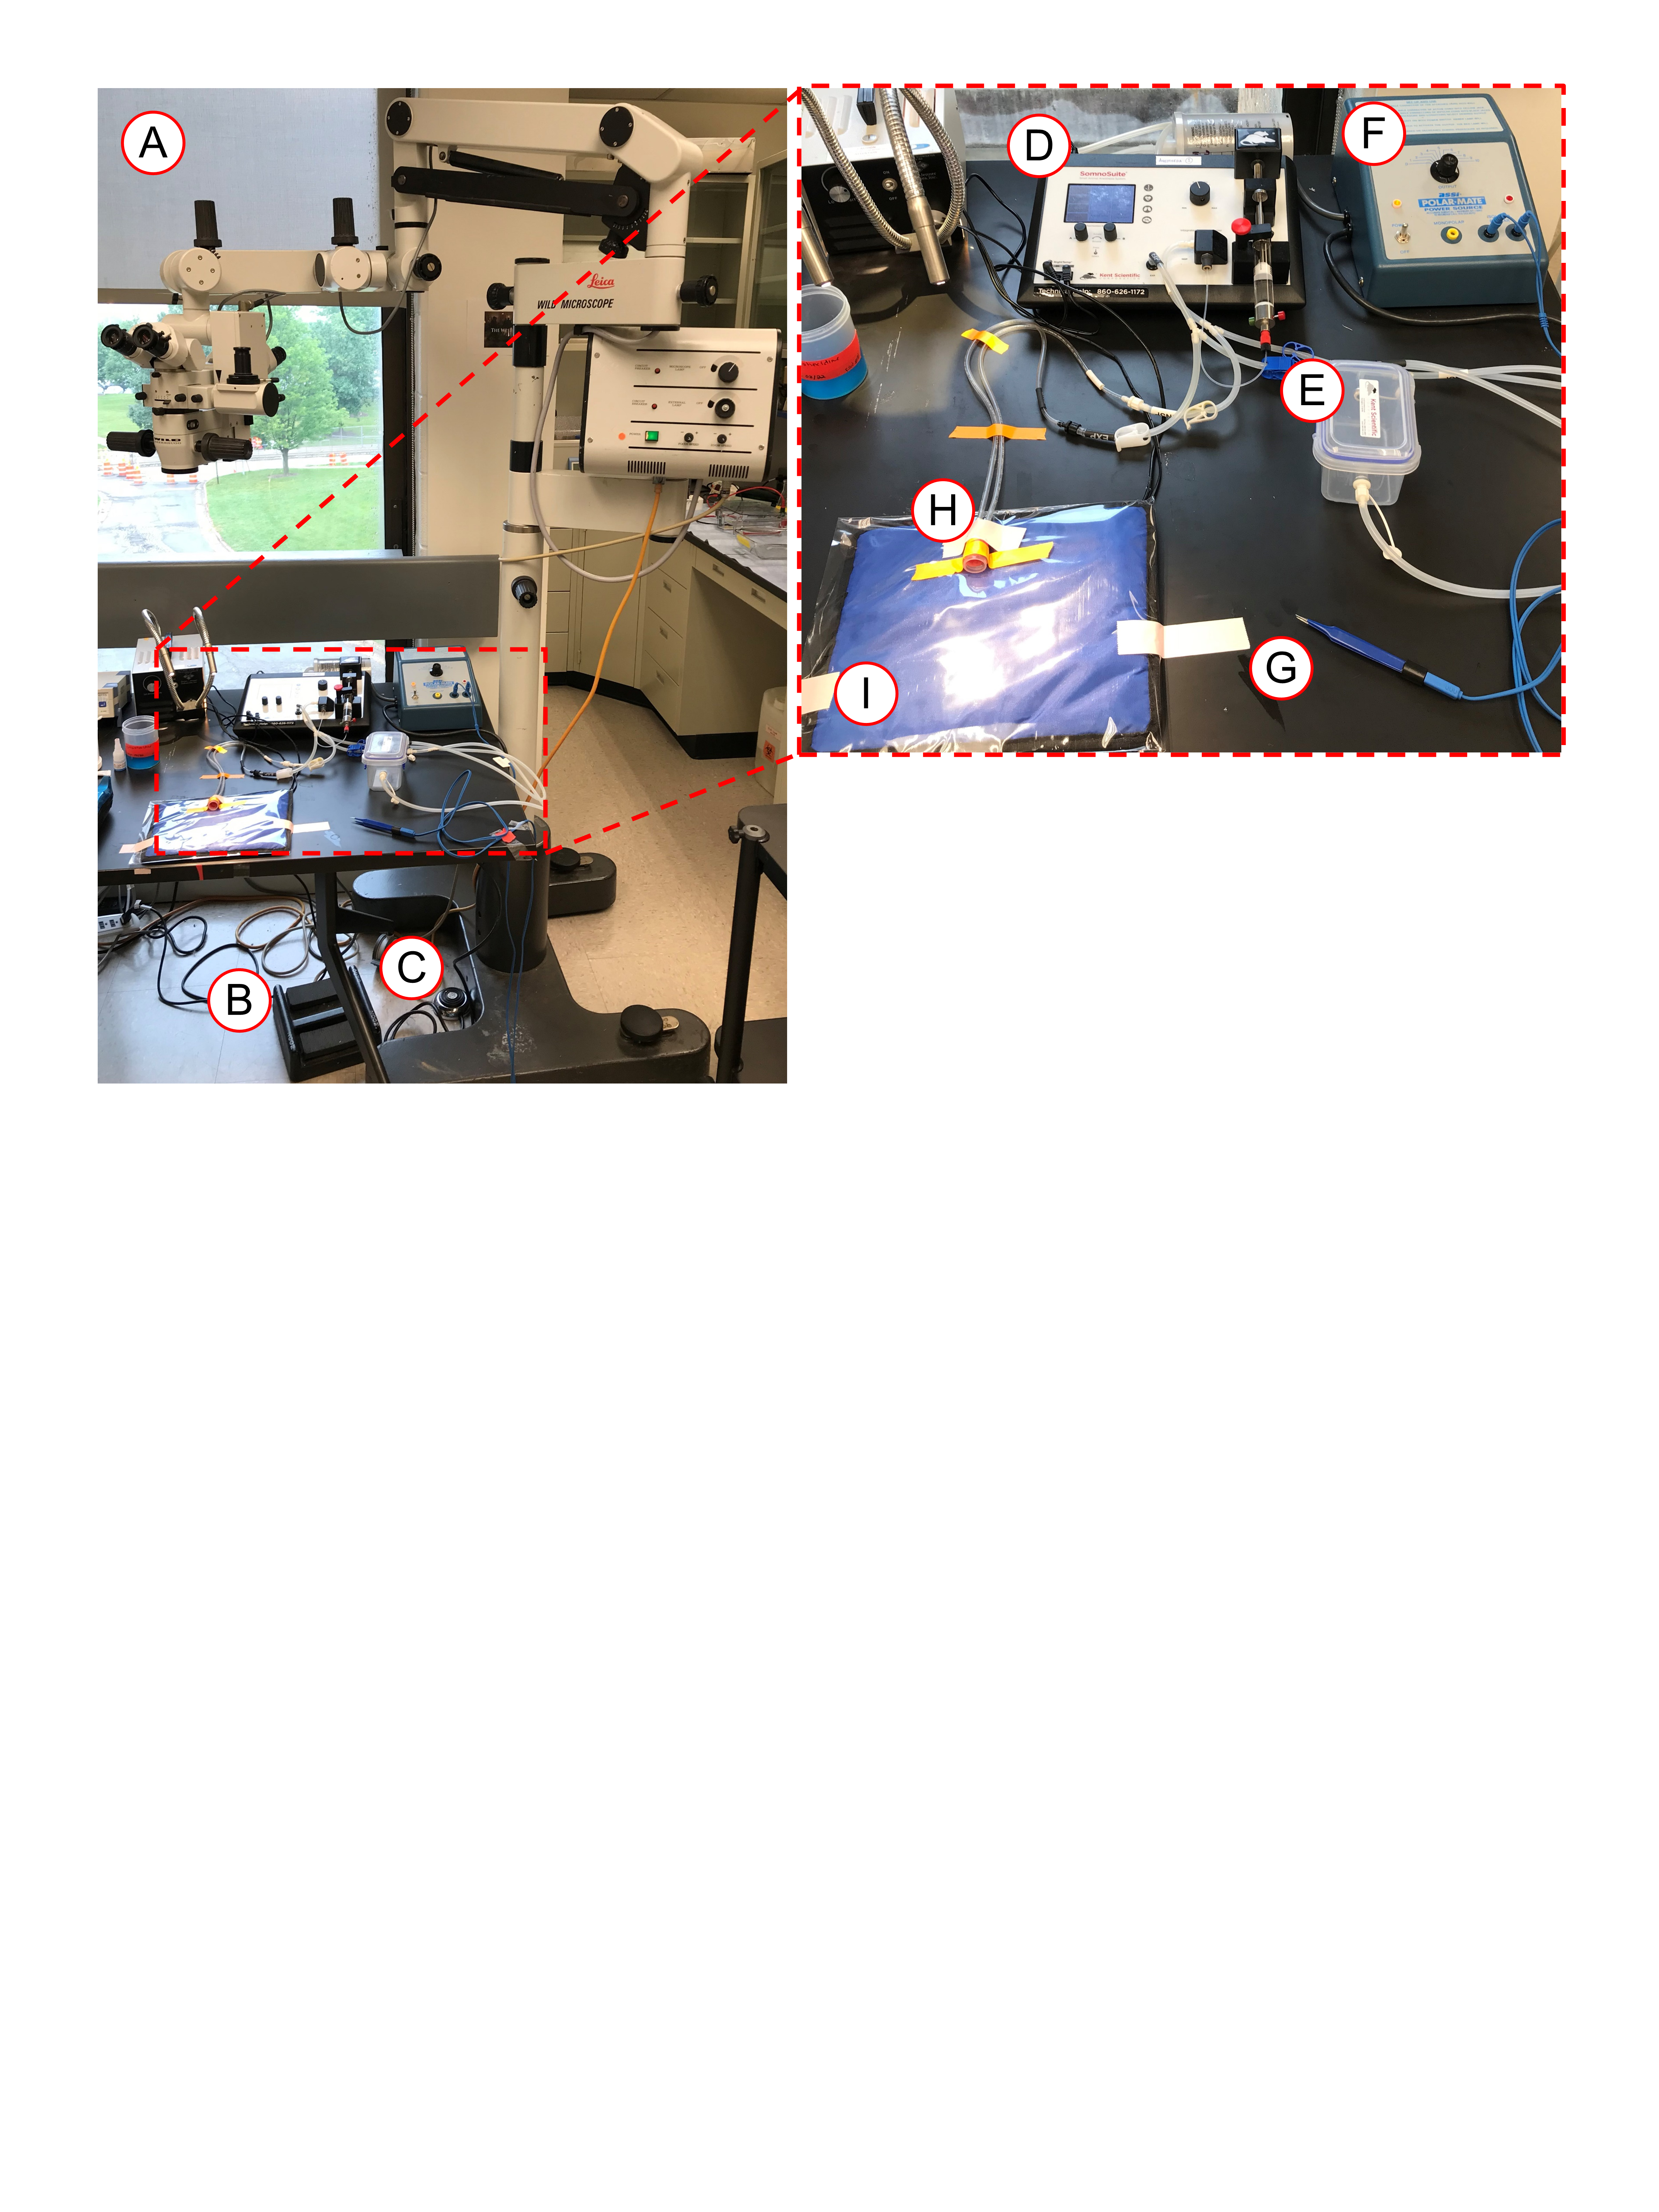


**Figure S4. Additional equipment used in MCAO surgery.**

**A)** Microscope, **B)** Microscope Foot Pedals, **C)** Bipolar Coagulator Foot Pedal, **D)** Somnosuite Low-Flow Anesthesia System, **E)** Anesthesia Induction Chamber, **F)** Bipolar Coagulator, **G)** Bipolar Forceps, **H)** Anesthesia Nose Cone, **I)** Warming Pad.
